# Supplementary material
Source: Royal Society of Chemistry journal article supplement (doi:10.1039/d6nj00331a)
Supplement: d6nj00331a1.pdf [file d6nj00331a1.pdf]

## Supplementary Information

### A biocompatible silver-loaded zeolite hydrocolloid dressing with rapid antimicrobial efficacy

Jinling Liu,<sup>a</sup> Ziwang Che,<sup>c</sup> Jun Shao,<sup>d</sup> Longhui Gong,<sup>e</sup> Mingxuan Xu,<sup>b</sup> Zezheng Zhou,<sup>a</sup> Xinai Yu,<sup>b</sup> Qiuping Qian,<sup>\*b</sup> and Yunlong Zhou<sup>\*a,b</sup>

<sup>a</sup>. School of Pharmaceutical Science, Zhejiang Chinese Medical University, Hangzhou 311400, China

<sup>b</sup>. Zhejiang Engineering Research Center for Tissue Repair Materials, Wenzhou Institute, University of Chinese Academy of Sciences, Wenzhou 325001, China.

<sup>c</sup>. State Key Laboratory of Advanced Processing and Recycling of Nonferrous Metals, Lanzhou University of Technology, Lanzhou, Gansu 730050, China.

<sup>d</sup>. School of Medicine and Health, Harbin Institute of Technology, Harbin 150001, China.

<sup>e</sup>. Department of Orthopaedics, Key Laboratory of Orthopaedics of Zhejiang Province, The Second Affiliated Hospital and Yuying Children's Hospital of Wenzhou Medical University; Wenzhou, Zhejiang 325035, China.

\* Corresponding author. E-mail: [zhouyl@ucas.ac.cn](mailto:zhouyl@ucas.ac.cn); [qianqp@ucas.ac.cn](mailto:qianqp@ucas.ac.cn)

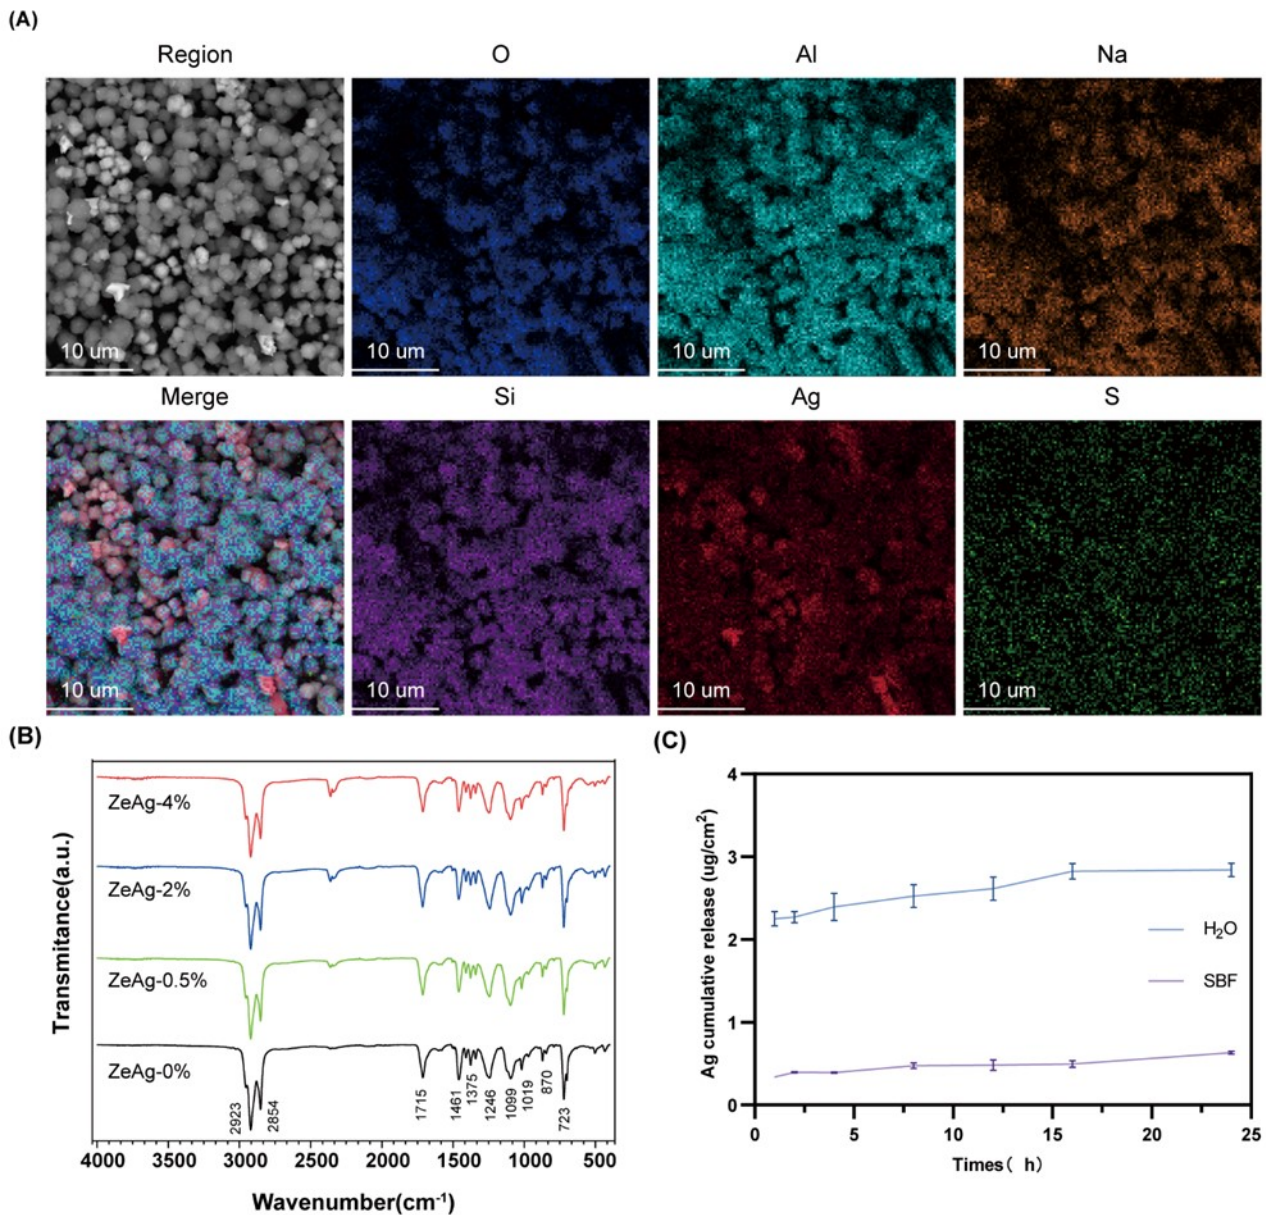

Fig. S1 (A) Phenom-EDS elemental maps of silver-loaded zeolite. (B) FT-IR spectra of silver-loaded zeolite integrated lipid-hydrocolloid dressings; (D) Ag<sup>+</sup> release profiles of ZeAg-4.0 % dressing in H<sub>2</sub>O and SBF.

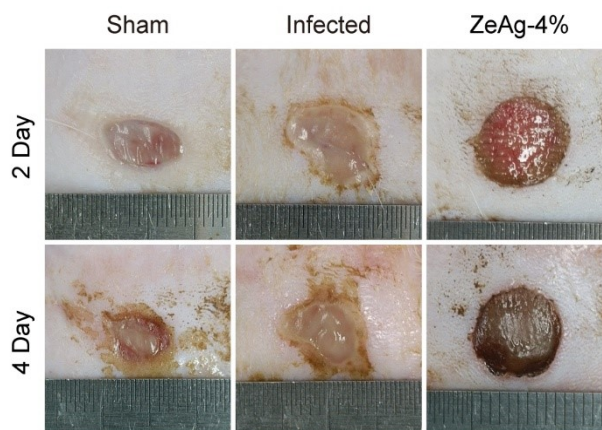

Fig. S2 Representative images of wound morphology in rats.

Table S1 Silver content of ZeAg and dressings.

| Sample         | ZeAg          | ZeAg-2.0%               | ZeAg-4.0%               | Atrauman®Ag                | Urigo®                    |
|----------------|---------------|-------------------------|-------------------------|----------------------------|---------------------------|
| Silver loading | 14.98 ± 0.04% | 26±2 ug/cm <sup>2</sup> | 52±3 ug/cm <sup>2</sup> | 400±100 ug/cm <sup>2</sup> | 283±47 ug/cm <sup>2</sup> |

Note: The ZeAg value represents the silver content (wt%) in the LTA zeolite. Dressing silver loadings are expressed as  $\mu\text{g cm}^{-2}$  to permit direct comparison with silver-dressing literature and commercial products.

Table S2 Hematological parameters from the acute systemic toxicity test(n = 3, mean ± SD)

| Parameter                                 | Parameter | Control   | ZeAg-4%     | Unit                |
|-------------------------------------------|-----------|-----------|-------------|---------------------|
| WBC count                                 | WBC       | 3.08±0.55 | 3.68±0.69   | 10 <sup>9</sup> /L  |
| Neutrophil count                          | Neu#      | 0.35±0.05 | 0.29±0.11   | 10 <sup>9</sup> /L  |
| Lymphocyte count                          | Lym#      | 2.49±0.50 | 3.08±0.69   | 10 <sup>9</sup> /L  |
| Monocyte count                            | Mon#      | 0.21±0.03 | 0.29±0.08   | 10 <sup>9</sup> /L  |
| Eosinophil count                          | Eos#      | 0.02±0.01 | 0.01±0.01   | 10 <sup>9</sup> /L  |
| Basophil count                            | Bas#      | 0.01±0.01 | 0.00±0.00   | 10 <sup>9</sup> /L  |
| Neutrophil percentage                     | Neu%      | 11.6±1.5  | 8.0±3.3     | %                   |
| Lymphocyte percentage                     | Lym%      | 80±2      | 83±5        | %                   |
| Monocyte percentage                       | Mon%      | 6.8±1.5   | 8.4±3.6     | %                   |
| Eosinophil percentage                     | Eos%      | 0.9±0.4   | 0.4±0.3     | %                   |
| Basophil percentage                       | Bas%      | 0.2±0.2   | 0.2±0.1     | %                   |
| RBC count                                 | RBC       | 5.67±0.23 | 6.05±0.21   | 10 <sup>12</sup> /L |
| Hemoglobin                                | HGB       | 135±2     | 144±2       | g/L                 |
| Hematocrit                                | HCT       | 44.1±2.3  | 49.9±1.0    | %                   |
| Mean corpuscular volume                   | MCV       | 78.0±6.8  | 82.6±3.3    | fL                  |
| Mean corpuscular hemoglobin               | MCH       | 23.9±1.3  | 23.9±0.9    | pg                  |
| Mean corpuscular hemoglobin concentration | MCHC      | 307±11    | 289±4       | g/L                 |
| Red-cell distribution width–CV            | RDW-CV    | 15.0±1.0  | 16.5±0.6    | %                   |
| Red-cell distribution width–SD            | RDW-SD    | 46.4±6.6  | 54.3±2.2    | fL                  |
| Platelet count                            | PLT       | 1016±84   | 1162±68**** | 10 <sup>9</sup> /L  |
| Mean platelet volume                      | MPV       | 7.4±0.4   | 7.6±0.7     | fL                  |
| Platelet distribution width               | PDW       | 16.0±0.4  | 16.2±0.2    |                     |
| Plateletcrit                              | PCT       | 0.75±0.04 | 0.845±0.058 | %                   |

Note: Data are mean ± SD (n = 3 rats/group, single measurement/rat). Significance vs. control by Student's t-test: \*P < 0.05, \*\*P < 0.01, \*\*\*P < 0.001, \*\*\*\*P < 0.0001. No symbol indicates not significant.

**Table S3** Clinical biochemistry data from the acute systemic toxicity test (n = 3, mean ± SD)

| Parameter                  | Abbreviation | Control        | ZeAg-4%          | Unit   |
|----------------------------|--------------|----------------|------------------|--------|
| Alanine Aminotransferase   | ALT          | 56.281±7.238   | 53.211±6.804     | U/L    |
| Aspartate Aminotransferase | AST          | 167.393±18.640 | 162.795±31.446   | U/L    |
| Total Bilirubin            | TBIL         | 18.422±2.083   | 17.871±4.084     | µmol/L |
| Total Bilirubin            | DBIL         | 3.171±0.438    | 3.552±1.527      | µmol/L |
| Albumin                    | ALB          | 37.111±0.430   | 35.299±1.884     | g/L    |
| Alkaline Phosphatase       | ALP          | 246.460±48.121 | 226.866±38.707   | U/L    |
| γ-Glutamyl Transferase     | γ-GT         | 0.868±0.405    | 1.065±0.812      | U/L    |
| Total Bile Acids           | TBA          | 27.224±10.473  | 11.704±5.059     | µmol/L |
| Total Protein              | TP           | 51.452±0.328   | 49.096±2.584     | g/L    |
| Urea                       | UREA         | 5.934±1.160    | 6.492±0.937      | mmol/L |
| Creatinine                 | CREA         | 35.970±2.812   | 44.908±8.340     | µmol/L |
| Uric Acid                  | UA           | 47.742±6.854   | 108.035±54.244** | µmol/L |

Note: Data are mean ± SD (n = 3 rats/group, single measurement/rat). Significance vs. control by Student's t-test: \*P < 0.05, \*\*P < 0.01, \*\*\*P < 0.001, \*\*\*\*P < 0.0001. No symbol indicates not significant.

**Table S4** Organ-to-body weight coefficients in the sub-acute systemic toxicity test (n = 3, mean ± SD)

| Organs               | Male        |             | Female      |                 |
|----------------------|-------------|-------------|-------------|-----------------|
|                      | control     | ZeAg-4%     | control     | ZeAg-4%         |
| Heart                | 0.334±0.011 | 0.263±0.004 | 0.328±0.014 | 0.317±0.021     |
| Liver                | 3.630±0.331 | 3.465±0.274 | 4.245±0.153 | 3.703±0.335**** |
| Spleen               | 0.166±0.028 | 0.167±0.005 | 0.205±0.009 | 0.197±0.011     |
| Lung                 | 0.306±0.011 | 0.301±0.017 | 0.397±0.019 | 0.368±0.026     |
| Kidney               | 0.638±0.050 | 0.531±0.095 | 0.665±0.026 | 0.609±0.054     |
| Thymus               | 0.116±0.017 | 0.146±0.009 | 0.210±0.044 | 0.224±0.042     |
| Adrenal gland        | 0.011±0.004 | 0.013±0.004 | 0.026±0.003 | 0.024±0.003     |
| Brain                | 0.300±0.047 | 0.350±0.020 | 0.534±0.029 | 0.541±0.020     |
| Testis/Ovary         | 0.494±0.096 | 0.524±0.009 | 0.041±0.006 | 0.045±0.005     |
| Epididymides/ Uterus | 0.086±0.007 | 0.108±0.006 | 0.237±0.083 | 0.152±0.073     |

Note: Data are mean ± SD (n = 3 rats/group, single measurement/rat). Significance vs. same-sex control by unpaired t-test: \*P < 0.05, \*\*P < 0.01, \*\*\*P < 0.001, \*\*\*\*P < 0.0001. No symbol indicates not significant.

**Table S5** Hematological parameters from the sub-acute systemic toxicity test (n = 3, mean ± SD)

| Parameter | Male      |           | Female    |            | Unit                |
|-----------|-----------|-----------|-----------|------------|---------------------|
|           | Control   | ZeAg-4%   | Control   | ZeAg-4%    |                     |
| WBC       | 6.67±0.63 | 2.8±0.7   | 1.19±0.56 | 3.23±2.18  | 10 <sup>9</sup> /L  |
| Neu#      | 0.58±0.10 | 0.27±0.05 | 0.17±0.07 | 0.45±0.24  | 10 <sup>9</sup> /L  |
| Lym#      | 5.79±0.71 | 2.26±0.60 | 0.93±0.52 | 2.58±1.85  | 10 <sup>9</sup> /L  |
| Mon#      | 0.26±0.03 | 0.22±0.05 | 0.09±0.01 | 0.17±0.09  | 10 <sup>9</sup> /L  |
| Eos#      | 0.05±0.02 | 0.02±0.01 | 0.00±0.00 | 0.03±0.01  | 10 <sup>9</sup> /L  |
| Bas#      | 0±0       | 0±0       | 0±0       | 0±0        | 10 <sup>9</sup> /L  |
| Neu%      | 8.8±2.1   | 10.3±2.7  | 14.5±3.9  | 17.2±5.9   | %                   |
| Lym%      | 86.6±2.4  | 80.8±2.7  | 74.3±7.6  | 74.5±8.9   | %                   |
| Mon%      | 3.9±0.7   | 8.0±0.1   | 9.9±6.7   | 6.5±1.9    | %                   |
| Eos%      | 0.7±0.2   | 0.8±0.2   | 1.1±0.3   | 1.8±1.1    | %                   |
| Bas%      | 0±0       | 0.03±0.05 | 0.2±0.2   | 0.0±0.0    | %                   |
| RBC       | 6.60±0.27 | 6.19±0.21 | 6.25±0.17 | 6.15±0.30  | 10 <sup>12</sup> /L |
| HGB       | 144±7     | 137±4     | 138±4     | 139±9      | g/L                 |
| HCT       | 44.4±1.7  | 42.2±1.2  | 44.0±2.0  | 43.3±2.6   | %                   |
| MCV       | 67.2±0.9  | 68.3±0.6  | 70.4±2.6  | 70.5±1.4   | fL                  |
| MCH       | 21.8±0.2  | 22.1±0.7  | 22.1±0.5  | 22.5±0.3   | pg                  |
| MCHC      | 324±3     | 324±7     | 315±6     | 319±4      | g/L                 |
| RDW-CV    | 14.8±0.6  | 14.7±0.5  | 13.5±0.7  | 14.5±0.5   | %                   |
| RDW-SD    | 38.9±1.8  | 39.5±1.0  | 37.6±3.5  | 40.3±2.2   | fL                  |
| PLT       | 874±69    | 908±33    | 838±29    | 973±50**** | 10 <sup>9</sup> /L  |
| MPV       | 7.0±0.2   | 7.3±0.5   | 7.70±0.36 | 7.20±0.24  | fL                  |
| PDW       | 15.7±0.0  | 15.7±0.2  | 16.0±0.3  | 15.7±0.2   |                     |

Note: Data are mean ± SD (n = 3 rats/group, single measurement/rat). Significance vs. same-sex control by unpaired t-test:

\*P < 0.05, \*\*P < 0.01, \*\*\*P < 0.001, \*\*\*\*P < 0.0001. No symbol indicates not significant.

**Table S6** Clinical biochemistry data from the sub-acute systemic toxicity test (n = 3, mean ± SD)

| Parameter | Male           |                  | Female         |                | Unit   |
|-----------|----------------|------------------|----------------|----------------|--------|
|           | Control        | ZeAg-4%          | Control        | ZeAg-4%        |        |
| ALT       | 53.505±1.146   | 53.232±6.130     | 54.122±1.309   | 52.940±10.876  | U/L    |
| AST       | 128.839±10.519 | 175.474±35.209   | 108.570±5.548  | 101.869±16.918 | U/L    |
| TBIL      | 9.595±0.469    | 8.781±0.406      | 23.790±11.349  | 13.422±2.724   | µmol/L |
| DBIL      | 4.699±0.433    | 4.615±0.400      | 11.571±6.263   | 7.164±1.275    | µmol/L |
| ALB       | 38.306±0.920   | 38.035±1.229     | 43.174±1.769   | 43.789±1.529   | g/L    |
| ALP       | 301.179±36.571 | 232.864±61.226** | 156.465±16.910 | 168.457±37.874 | U/L    |
| γ-GT      | 0.906±0.012    | 0.885±0.010      | 1.639±0.441    | 0.889±0.510    | U/L    |
| TBA       | 12.263±4.495   | 37.761±33.132    | 5.198±0.965    | 15.523±4.901   | µmol/L |
| TP        | 55.754±1.732   | 53.681±3.190     | 59.064±3.807   | 60.080±2.503   | g/L    |
| UREA      | 19.190±1.702   | 18.067±0.682     | 14.291±1.493   | 11.596±0.493   | mmol/L |
| CREA      | 39.381±3.787   | 37.117±1.141     | 46.287±4.519   | 44.554±0.543   | µmol/L |
| UA        | 87.758±14.827  | 83.971±8.916     | 65.536±16.860  | 85.746±11.393  | µmol/L |

Note: Data are mean ± SD (n = 3 rats/group, single measurement/rat). Significance vs. same-sex control by unpaired t-test: \*P < 0.05, \*\*P < 0.01, \*\*\*P < 0.001, \*\*\*\*P < 0.0001. No symbol indicates not significant.

**Table S7** ZeAg-4% vs. Representative Commercial Silver Dressings: Performance Comparison

| Dressing / benchmark | Silver form / matrix                           | Ag loading                                           | Evidence advantage / limitation                                                                                                                                       | Best use in our argument                                      |
|----------------------|------------------------------------------------|------------------------------------------------------|-----------------------------------------------------------------------------------------------------------------------------------------------------------------------|---------------------------------------------------------------|
| ZeAg-4%              | Ag-exchanged LTA zeolite in lipid-hydrocolloid | $52 \pm 3 \mu\text{g cm}^{-2}$                       | Direct data: inhibition zone, kill kinetics, Ag-release/killing correlation, biofilm, infected wound, cytocompatibility, irritation, sensitization, systemic toxicity | Low-silver loading + complete evidence chain                  |
| Promogran Prisma™    | collagen/ORC + silver-ORC                      | $20 \mu\text{g cm}^{-2}$                             | Low-silver commercial benchmark; reported biofilm effects vary by model                                                                                               | Shows we acknowledge reviewer-recommended comparator          |
| Aquacel Ag+ Extra™   | Hydrofiber + Ag+ technology                    | $0.17 \text{ mg cm}^{-2} = 170 \mu\text{g cm}^{-2}$  | Commercial biofilm-targeting benchmark; contains additional biofilm-disrupting agents                                                                                 | Shows ZeAg-4% is lower silver than this benchmark             |
| Urgo®                | SSD lipid-hydrogel                             | $283 \pm 47 \mu\text{g cm}^{-2}$                     | Direct comparator; comparable inhibition-zone activity, but higher silver loading                                                                                     | Shows ZeAg-4% improves apparent silver-utilization efficiency |
| Atrauman® Ag         | Ag-containing ointment gauze                   | $400 \pm 100 \mu\text{g cm}^{-2}$                    | Direct comparator; good cytocompatibility but much higher silver loading                                                                                              | Shows ZeAg-4% achieves antibacterial activity at lower silver |
| Acticoat™            | nanocrystalline silver                         | $1.70 \text{ mg cm}^{-2} = 1700 \mu\text{g cm}^{-2}$ | High-silver rapid-kill benchmark                                                                                                                                      | Shows ZeAg-4% avoids high-silver design                       |
